# Supplementary material for: Reference equations for evaluation of spirometry function tests in South Asia, and among South Asians living in other countries
Source: PubMed Central journal article supplement (PMC9712850; doi:10.1183/13993003.02962-2021), 2022-12-01
Supplement: ERJ-02962-2021.Supplement.pdf [file ERJ-02962-2021.Supplement.pdf]

## **Supplementary tables**

**Table S1.** Number of subjects categorised by exclusion criteria.

| <b>Exclusion Criteria</b>                                                                                                                                                                                                                     | <b>Female</b> | <b>Male</b> | <b>Total</b> |
|-----------------------------------------------------------------------------------------------------------------------------------------------------------------------------------------------------------------------------------------------|---------------|-------------|--------------|
| <b>No. of subjects before exclusion</b>                                                                                                                                                                                                       | 27,285        | 16,187      | 43,472       |
| <b>*Current or ex-smokers</b>                                                                                                                                                                                                                 | 375           | 6,420       | 6,795        |
| <b>*Lung disease: asthma, emphysema, chronic obstructive pulmonary disease (COPD), lung fibrosis, lung cancer or tuberculosis (TB)</b>                                                                                                        | 996           | 298         | 1,294        |
| <b>*Respiratory symptoms in the last 6 months: breathlessness during normal activity, persistent cough (at least 2 weeks), sputum during coughing, blood in the sputum, wheezing in the chest or early morning cough with chest tightness</b> | 7,875         | 2,598       | 10,473       |
| <b>*Cardiovascular diseases: Angina pectoris, Myocardial Infarction, Stroke</b>                                                                                                                                                               | 1,407         | 385         | 1,792        |
| <b>Unavailable spirometry data or spirometry grading= D, E, F</b>                                                                                                                                                                             | 11,155        | 4,510       | 15,665       |
| <b>No. of subjects after exclusion</b>                                                                                                                                                                                                        | 5,477         | 1,976       | 7,453        |

\*Based on self-reported questionnaire

**Table S2.** List of South Asian spirometry equation studies published since 2005

|                                           | Location                    | Age (yrs) | Sample size                                       | Remarks                     |
|-------------------------------------------|-----------------------------|-----------|---------------------------------------------------|-----------------------------|
| <b>Bangladesh</b>                         |                             |           |                                                   |                             |
| Khuda et al. (2013) <sup>1</sup>          | Bangladesh                  | 18-40     | 995 healthy adults<br>(628 males, 367 females)    | Not included (No full-text) |
| <b>India</b>                              |                             |           |                                                   |                             |
| Saleem et al. (2012) <sup>2</sup>         | Kashmir                     | 18-65     | 3080 healthy adults<br>(1974 males; 1106 females) | Included                    |
| Chhabra et al. (2014) <sup>3</sup>        | Delhi                       | 18-71     | 685 healthy adults<br>(489 males; 196 females)    | Included                    |
| Dasgupta et al. (2015) <sup>4</sup>       | Kolkata                     | 15-69     | 619 healthy adults (491 males,<br>128 females)    | Included                    |
| Desai et al. (2016) <sup>5</sup>          | Mumbai                      | 18-75     | 310 healthy adults<br>(185 males, 125 females)    | Included                    |
| Biswas et al. (2018) <sup>6</sup>         | Arunachal Pradesh           | 18-60     | 711 healthy adults (544 male, 167<br>females)     | Included                    |
| Agarwal et al. (2020) <sup>7</sup>        | Western India               | >18 years | 1258 healthy adults                               | Included                    |
| <b>Pakistan</b>                           |                             |           |                                                   |                             |
| Memon et al. (2007) <sup>8</sup>          | Karachi                     | 15-65     | 504 healthy adults<br>(321 males; 183 females)    | Included                    |
| <b>Sri Lanka</b>                          |                             |           |                                                   |                             |
| Sooriyakanthan et al. (2019) <sup>9</sup> | Northern Sri Lanka (Tamils) | 14-85     | 775 males; 687 females                            | Included                    |

<sup>1</sup>Khuda KM, Sultana R, Bari MR, Islam R, Erfan MA. Spirometric standard of healthy Bangladeshi adults aged 18-40 years. *Mymensingh Med J*. 2013 Jan;22(1):101-9.

<sup>2</sup>Saleem S, Shah S, Gailson L, et al. Normative Spirometric Values in Adult Kashmiri Population. *Indian J Chest Dis Allied Sci* 2012; 54:227-33.

<sup>3</sup>Chhabra SK, Kumar R, Gupta U, Rahman M, Dash DJ. Prediction equations for spirometry in adults from northern India. *Indian J Chest Dis Allied Sci*. 2014 Oct-Dec;56(4):221-9. Erratum in: *Indian J Chest Dis Allied Sci*. 2015 Jul-Sep;57(3):204.

<sup>4</sup>Dasgupta A, Ghoshal AG, Mukhopadhyay A, et al. Reference equation for spirometry interpretation for Eastern India. *Lung India* 2015.

<sup>5</sup>Desai U, Joshi JM, Chhabra SK, Rahman M-U. Prediction equations for spirometry in adults in western India. *Indian J Tuberc* 2016; 63: 176-82.

<sup>6</sup>Biswas Mrinmoy. Spirometry Prediction Equations for North-eastern Indian Population. *Indian J Physiol Pharmacol* 2018; : 431-8.

<sup>7</sup>Aggarwal A, Agarwal R, Dhooria S, et al. Joint Indian Chest Society-National College of Chest Physicians (India) guidelines for spirometry. *Lung India* 2019.

<sup>8</sup>Memon MA, Sandila MP, Ahmed ST. Spirometric reference values in healthy, non-smoking, urban Pakistani population. *J Pak Med Assoc* 2007; 57: 193-5.

<sup>9</sup>Sooriyakanthan M, Wimalasekera S, Kanagasabai S. Establishment of Reference Norms for Lung Function Parameters of Healthy Sri Lankan Tamils. *Pulm. Med* 2019

**Table S3.** List of South Asia reference equations used in this study

| Publication           | Sex                         | LFP                      | Predictive Equations                | SEE   |
|-----------------------|-----------------------------|--------------------------|-------------------------------------|-------|
| Saleem et al. (2012)  | Female                      |                          |                                     |       |
|                       | 15- 30 yrs                  | FEV <sub>1</sub>         | -0.468-0.015Age+0.023Heigh          | 0.442 |
|                       | 31-50 yrs                   |                          | 0.063-0.004Age+0.017Height          | 0.416 |
|                       | >50 yrs                     |                          | -1.356-0.002Age+0.024Height         | 0.410 |
|                       | 15- 30 yrs                  | FVC                      | 0.244-0.022Age+0.022Height          | 0.454 |
|                       | 31-50 yrs                   |                          | 0.508-0.004Age+0.016Height          | 0.446 |
|                       | ≥50 yrs                     |                          | -0.772-0.002Age+0.022Height         | 0.442 |
|                       | 15- 30 yrs                  | FEV <sub>1</sub> /FVC(%) | 67.8+0.137Age+0.105Height           | 3.139 |
|                       | 31-50 yrs                   |                          | 75.836-0.012Age+0.077Height         | 3.095 |
|                       | ≥50 yrs                     |                          | 54.976-0.021Age+0.205Height         | 3.166 |
|                       | Male                        |                          |                                     |       |
|                       | 15- 30 yrs                  | FEV <sub>1</sub>         | -1.136-0.014Age+0.033Height         | 0.627 |
|                       | 31-50 yrs                   |                          | 0.242-0.005Age+0.023Height          | 0.634 |
|                       | ≥50 yrs                     |                          | -1.483-0.030Age+0.037Height         | 0.563 |
|                       | 15- 30 yrs                  | FVC                      | -0.416-0.021Age+0.032Height         | 0.685 |
|                       | 31-50 yrs                   |                          | 0.411-0.005Age+0.025Height          | 0.671 |
|                       | ≥50 yrs                     |                          | -1.747-0.031Age+0.04Height          | 0.589 |
|                       | 15- 30 yrs                  | FEV <sub>1</sub> /FVC(%) | 72.742+0.106Age+0.089Height         | 2.891 |
|                       | 31-50 yrs                   |                          | 85.516-0.004Age+0.026Height         | 2.722 |
| ≥50 yrs               | 84.987-0.085Age+0.047Height |                          | 3.537                               |       |
| Chhabra et al. (2014) | Female                      | FEV <sub>1</sub> (L)     | -2.267 – 0.019(Age) + 0.033(Height) | 0.286 |

|                        |        |                           |                                                                                           |       |
|------------------------|--------|---------------------------|-------------------------------------------------------------------------------------------|-------|
|                        |        | FVC (L)                   | $20.07 - 0.010(\text{Age}) - 0.261(\text{Height}) + 0.000971(\text{Height}^2)$            | 0.315 |
|                        |        | FEV <sub>1</sub> /FVC (%) | $97.182 - 0.440(\text{Age})$                                                              | 4.97  |
|                        | Male   | FEV <sub>1</sub> (L)      | $-3.682 - 0.024(\text{Age}) + 0.046(\text{Height})$                                       | 0.402 |
|                        |        | FVC (L)                   | $-5.048 - 0.014(\text{Age}) + 0.054(\text{Height}) + 0.006(\text{Weight})$                | 0.479 |
|                        |        | FEV <sub>1</sub> /FVC(%)  | $102.56 - 0.679(\text{Age}) + 0.00477(\text{Age}^2) - 0.080(\text{Weight})$               | 5.79  |
| Dasgupta et al. (2015) | Female | FEV <sub>1</sub> (L)      | $0.0381 - 0.0197(\text{Age}) + 0.0196(\text{Height})$                                     | 0.370 |
|                        |        | FVC (L)                   | $0.0972 - 0.0186(\text{Age}) + 0.0216(\text{Height})$                                     | 0.465 |
|                        |        | FEV <sub>1</sub> /FVC     | $0.9205 - 0.00214(\text{Age}) + 0.00001(\text{Height})$                                   | 0.076 |
|                        | Male   | FEV <sub>1</sub> (L)      | $-1.7649 - 0.0218(\text{Age}) + 0.0337(\text{Height})$                                    | 0.434 |
|                        |        | FVC (L)                   | $-2.5370 - 0.0211(\text{Age}) + 0.0418(\text{Height})$                                    | 0.518 |
|                        |        | FEV <sub>1</sub> /FVC     | $1.08994 - 0.00133(\text{Age}) - 0.0012(\text{Height})$                                   | 0.092 |
| Desai et al. (2016)    | Female | FEV <sub>1</sub> (L)      | $\text{Exp}[-1.552 + 0.0043(\text{Age}) - 0.000144(\text{Age}^2) + 0.015(\text{Height})]$ | 0.115 |
|                        |        | FVC (L)                   | $\text{Exp}[-1.616 + 0.014(\text{Age}) - 0.000219(\text{Age}^2) + 0.015(\text{Height})]$  | 0.097 |
|                        |        | FEV <sub>1</sub> /FVC(%)  | $104.35 - 0.085(\text{Age}) + 0.0065(\text{Age}^2)$                                       | 6.34  |
|                        | Male   | FEV <sub>1</sub> (L)      | $-3.275 - 0.020(\text{Age}) + 0.043(\text{Height})$                                       | 0.346 |
|                        |        | FVC (L)                   | $\text{Exp}[-1.048 - 0.0045(\text{Age}) + 0.015(\text{Height})]$                          | 0.111 |
|                        |        | FEV <sub>1</sub> /FVC(%)  | $89.09 - 0.179(\text{Age})$                                                               | 4.73  |
| Biswas et al. (2019)   | Female | FEV <sub>1</sub> (L)      | $0.770 - 0.021(\text{Age}) + 0.011(\text{Height})$                                        | 0.356 |
|                        |        | FVC (L)                   | $0.687 - 0.021(\text{Age}) + 0.014(\text{Height})$                                        | 0.359 |
|                        |        | FEV <sub>1</sub> /FVC     | N/A                                                                                       |       |
|                        | Male   | FEV <sub>1</sub> (L)      | $0.269 - 0.025(\text{Age}) + 0.020(\text{Height})$                                        | 0.460 |
|                        |        | FVC (L)                   | $0.003 - 0.024(\text{Age}) + 0.024(\text{Height})$                                        | 0.448 |
|                        |        | FEV <sub>1</sub> /FVC     | N/A                                                                                       |       |

|                              |        |                          |                                                                 |         |
|------------------------------|--------|--------------------------|-----------------------------------------------------------------|---------|
| Agarwal et al. (2020)        | Female | FEV <sub>1</sub> (L)     | $-0.8376314 - 0.0095561(\text{Age}) + 0.0210584(\text{Height})$ | 0.30546 |
|                              |        | FVC (L)                  | $-1.217951 - 0.0061151(\text{Age}) + 0.0253754(\text{Height})$  | 0.36038 |
|                              |        | FEV <sub>1</sub> /FVC(%) | $91.41677 - 0.2019615(\text{Age}) - 0.003514(\text{Height})$    | 5.7629  |
|                              | Male   | FEV <sub>1</sub> (L)     | $-0.6050618 - 0.0172575(\text{Age}) + 0.0249218(\text{Height})$ | 0.40664 |
|                              |        | FVC (L)                  | $-1.00747 - 0.0129677(\text{Age}) + 0.0299966(\text{Height})$   | 0.48185 |
|                              |        | FEV <sub>1</sub> /FVC(%) | $88.87519 - 0.2001275(\text{Age}) + 0.0084023(\text{Height})$   | 5.056   |
| Memon et al. (2007)          | Female | FEV <sub>1</sub> (L)     | $-1.866 - 0.019(\text{Age}) + 0.032(\text{Height})$             | 0.480   |
|                              |        | FVC (L)                  | $-3.072 - 0.020(\text{Age}) + 0.042(\text{Height})$             | 0.611   |
|                              |        | FEV <sub>1</sub> /FVC    | N/A                                                             |         |
|                              | Male   | FEV <sub>1</sub> (L)     | $-1.440 - 0.020(\text{Age}) + 0.030(\text{Height})$             | 0.427   |
|                              |        | FVC (L)                  | $-0.848 - 0.020(\text{Age}) + 0.032(\text{Height})$             | 0.508   |
|                              |        | FEV <sub>1</sub> /FVC    | N/A                                                             |         |
| Sooriyakanthan et al. (2019) | Female | FEV <sub>1</sub> (L)     | $- 1.186 - 0.018(\text{Age}) + 0.026(\text{Height})$            | 0.306   |
|                              |        | FVC (L)                  | $- 1.985 - 0.018(\text{Age}) + 0.033(\text{Height})$            | 0.364   |
|                              |        | FEV <sub>1</sub> /FVC    | N/A                                                             |         |
|                              | Male   | FEV <sub>1</sub> (L)     | $- 2.192 - 0.021(\text{Age}) + 0.036(\text{Height})$            | 0.398   |
|                              |        | FVC (L)                  | $- 3.311 - 0.022(\text{Age}) + 0.046(\text{Height})$            | 0.469   |
|                              |        | FEV <sub>1</sub> /FVC    | N/A                                                             |         |

**Table S4. Summary of post hoc statistical test (tukey) for comparing differences in mean for FEV<sub>1</sub>, FVC and FEV<sub>1</sub>/FVC between countries (Bangladesh, India, Pakistan and Sri Lanka) \***

|                           | FEV <sub>1</sub> (L) |         | FVC (L)    |         | FEV <sub>1</sub> /FVC |         |
|---------------------------|----------------------|---------|------------|---------|-----------------------|---------|
|                           | Mean diff.           | p-value | Mean diff. | p-value | Mean diff.            | p-value |
| <b>Female</b>             |                      |         |            |         |                       |         |
| North India – Bangladesh  | -0.11                | <0.0001 | -0.11      | <0.0001 | -0.01                 | <0.0001 |
| South India – Bangladesh  | -0.44                | <0.0001 | -0.61      | <0.0001 | 0.06                  | <0.0001 |
| Pakistan – Bangladesh     | -0.12                | <0.0001 | -0.11      | 0.013   | -0.01                 | 0.058   |
| Sri Lanka – Bangladesh    | - 0.11               | <0.0001 | -0.18      | <0.0001 | 0.02                  | <0.0001 |
| South India – North India | -0.33                | <0.0001 | -0.50      | <0.0001 | 0.06                  | <0.0001 |
| Pakistan – North India    | -0.01                | 0.999   | 0.00       | 1.000   | -0.00                 | 1.000   |
| Sri Lanka – North India   | -0.00                | 1.000   | -0.07      | 0.001   | 0.03                  | <0.0001 |
| Pakistan – South India    | 0.32                 | <0.0001 | 0.50       | <0.0001 | -0.06                 | <0.0001 |
| Sri Lanka – South India   | 0.32                 | <0.0001 | 0.43       | <0.0001 | -0.03                 | <0.0001 |
| Sri Lanka – Pakistan      | 0.01                 | 0.999   | -0.07      | 0.258   | 0.03                  | <0.0001 |
| <b>Male</b>               |                      |         |            |         |                       |         |
| North India – Bangladesh  | -0.13                | 0.001   | -0.13      | 0.003   | -0.01                 | 0.325   |
| South India – Bangladesh  | -0.53                | <0.0001 | -0.70      | <0.0001 | 0.02                  | 0.044   |
| Pakistan – Bangladesh     | -0.04                | 0.982   | 0.03       | 0.998   | -0.01                 | 0.308   |
| Sri Lanka – Bangladesh    | -0.09                | 0.074   | -0.16      | 0.001   | 0.01                  | 0.010   |
| South India – North India | -0.41                | <0.0001 | -0.57      | <0.0001 | 0.02                  | 0.001   |
| Pakistan – North India    | 0.09                 | 0.729   | 0.16       | 0.295   | -0.01                 | 0.823   |
| Sri Lanka – North India   | 0.03                 | 0.895   | -0.03      | 0.959   | 0.02                  | <0.0001 |
| Pakistan – South India    | 0.50                 | <0.0001 | 0.73       | <0.0001 | -0.03                 | 0.006   |
| Sri Lanka – South India   | 0.44                 | <0.0001 | 0.54       | <0.0001 | -0.00                 | 0.991   |
| Sri Lanka – Pakistan      | -0.05                | 0.943   | -0.19      | 0.169   | 0.03                  | 0.004   |

\*represents the differences in mean between 2 countries [eg. North India – Bangladesh= Mean of FEV<sub>1</sub> (North India) – Mean of FEV<sub>1</sub> (Bangladesh)]

**Table S5.** Baseline characteristics of external study participants (HELIOS) by sex values are expressed in mean (SD), unless indicated otherwise (n=339).

|                                | <b>Female</b> | <b>Male</b> |
|--------------------------------|---------------|-------------|
| <b>n</b>                       | <b>214</b>    | <b>125</b>  |
| <b>Age (yrs)</b>               | 50.8 (11.1)   | 51.3 (10.5) |
| <b>Age group (yrs)</b>         | %             | %           |
| 30-39                          | 18.7          | 12.8        |
| 40-39                          | 24.3          | 32.0        |
| 50-59                          | 36.0          | 34.3        |
| ≥60                            | 21.0          | 20.8        |
| <b>Height (cm)</b>             | 157.1 (5.9)   | 170.4 (5.9) |
| <b>Weight (kg)</b>             | 67.7 (14.1)   | 77.9 (11.9) |
| <b>FEV<sub>1</sub> (L)</b>     | 1.94 (0.44)   | 2.75 (0.55) |
| <b>FVC (L)</b>                 | 2.36 (0.53)   | 3.38 (0.61) |
| <b>FEV<sub>1</sub>/FVC (%)</b> | 82.1 (5.4)    | 81.5 (5.9)  |

**TableS6.** Mean z-scores and % of subjects with z-scores below -1.645 in male (n=1976) and female (n=5477) using GLI2012 and NHANESIII reference values.

| <b>GLI 2012</b>         |                            |                    |                          |                       |                    |                          |                            |                    |                          |
|-------------------------|----------------------------|--------------------|--------------------------|-----------------------|--------------------|--------------------------|----------------------------|--------------------|--------------------------|
| <b>Ethnic</b>           | <b>FEV<sub>1</sub> (L)</b> |                    |                          | <b>FVC (L)</b>        |                    |                          | <b>FEV<sub>1</sub>/FVC</b> |                    |                          |
| <b>Others/Mixed</b>     | <i>Predicted (SD)</i>      | <i>z-score(SD)</i> | <i>z &lt; -1.645 (%)</i> | <i>Predicted (SD)</i> | <i>z-score(SD)</i> | <i>z &lt; -1.645 (%)</i> | <i>Predicted (SD)</i>      | <i>z-score(SD)</i> | <i>z &lt; -1.645 (%)</i> |
| <i>Male</i>             | 3.16 (0.46)***             | -1.43 (1.05)       | 39.9                     | 3.85 (0.51)***        | -1.46 (1.16)       | 41.7                     | 0.82 (0.02)***             | -0.20 (1.01)       | 8.1                      |
| <i>Female</i>           | 2.32 (0.34)***             | -1.65 (1.04)       | 48.8                     | 2.77 (0.36)***        | -1.69 (1.18)       | 49.0                     | 0.84 (0.03)***             | -0.15 (1.04)       | 5.3                      |
| <b>African-American</b> |                            |                    |                          |                       |                    |                          |                            |                    |                          |
| <i>Male</i>             | 2.89 (0.42)***             | -0.80 (1.06)       | 19.7                     | 3.53 (0.46)***        | -0.75 (1.10)       | 19.2                     | 0.82 (0.02)***             | -0.16 (0.96)       | 6.8                      |
| <i>Female</i>           | 2.14 (0.31)***             | -1.08 (1.03)       | 27.4                     | 2.58 (0.33)***        | -1.06 (1.10)       | 26.5                     | 0.83 (0.03)***             | -0.07 (0.99)       | 4.2                      |
| <b>Caucasian</b>        |                            |                    |                          |                       |                    |                          |                            |                    |                          |
| <i>Male</i>             | 3.39 (0.49)***             | -1.86 (0.98)       | 58.2                     | 4.18 (0.55)***        | -1.89 (1.02)       | 58.6                     | 0.81 (0.02)***             | -0.05 (0.94)       | 5.3                      |
| <i>Female</i>           | 2.49 (0.36)***             | -2.07 (0.98)       | 66.8                     | 3.01 (0.39)***        | -2.11 (1.05)       | 66.5                     | 0.83 (0.03)*               | 0.00 (0.97)        | 3.2                      |
| <b>South-East Asian</b> |                            |                    |                          |                       |                    |                          |                            |                    |                          |
| <i>Male</i>             | 3.11 (0.45)***             | -1.30 (1.05)       | 34.8                     | 3.71 (0.49)***        | -1.12 (1.10)       | 29.5                     | 0.84 (0.03)***             | -0.46 (1.02)       | 11.4                     |
| <i>Female</i>           | 2.20 (0.32)***             | -1.27 (1.03)       | 33.9                     | 2.59 (0.33)***        | -1.12 (1.14)       | 28.9                     | 0.85 (0.02)***             | -0.42 (1.06)       | 9.4                      |
| <b>NHANESIII</b>        |                            |                    |                          |                       |                    |                          |                            |                    |                          |
| <b>Ethnic</b>           | <b>FEV<sub>1</sub> (L)</b> |                    |                          | <b>FVC (L)</b>        |                    |                          | <b>FEV<sub>1</sub>/FVC</b> |                    |                          |
| <b>Caucasian</b>        | <i>Predicted (SD)</i>      | <i>Mean (SD)</i>   | <i>z &lt; -1.645 (%)</i> | <i>Predicted (SD)</i> | <i>Mean (SD)</i>   | <i>z &lt; -1.645 (%)</i> | <i>Predicted (SD)</i>      | <i>Mean (SD)</i>   | <i>z &lt; -1.645 (%)</i> |
| <i>Male</i>             | 3.38 (0.53)***             | -2.05 (1.15)       | 63.3                     | 4.26 (0.57)***        | -2.28 (1.128)      | 72.2                     | 0.79 (0.03)***             | 0.31 (1.08)        | 4.5                      |
| <i>Female</i>           | 2.50 (0.38)***             | -2.23 (1.07)       | 70.8                     | 3.06 (0.38)***        | -2.36 (1.084)      | 75.4                     | 0.81 (0.03)***             | 0.17 (1.07)        | 3.8                      |
| <b>African-American</b> |                            |                    |                          |                       |                    |                          |                            |                    |                          |
| <i>Male</i>             | 2.85 (0.45)***             | -0.70 (1.06)       | 17.6                     | 3.51 (0.47)***        | -0.71 (1.12)       | 18.5                     | 0.81 (0.02)*               | -0.07 (0.99)       | 6.3                      |
| <i>Female</i>           | 2.06 (0.37)***             | -0.76 (1.04)       | 18.3                     | 2.49 (0.38)***        | -0.78 (1.05)       | 18.5                     | 0.83 (0.03)                | -0.03 (0.98)       | 4.1                      |

Paired sample t-test (observed-predicted) p-value: \*\*\*<0.0001; \*\*<0.001; \*<0.01



**Table S7.** Mean of predicted values, z-scores and % of subjects with z-scores below -1.645, in males (n=1976) and females (n=5477) using published South Asian reference values.

| FEV <sub>1</sub> (L)       | Female             |              |               | Male               |              |               |
|----------------------------|--------------------|--------------|---------------|--------------------|--------------|---------------|
|                            | Predicted (sd)     | z-score (sd) | z <-1.645 (%) | Predicted (SD)     | z-score (sd) | z <-1.645 (%) |
| <i>Observed</i>            | <i>1.81 (0.43)</i> | -            | -             | <i>2.55 (0.59)</i> | -            | -             |
| CHH                        | 1.89 (0.34)***     | -0.28 (1.15) | 11.3          | 2.78 (0.48)***     | -0.57 (1.15) | 16.3          |
| DAS                        | 2.13 (0.30)***     | -0.87 (0.87) | 17.5          | 2.78 (0.39)***     | -0.53 (1.04) | 13.5          |
| DES                        | 1.85 (0.29)***     | -0.37 (2.82) | 30.1          | 2.87 (0.42)***     | -0.94 (1.31) | 26.3          |
| BIS                        | 1.50 (0.29)***     | 0.86 (0.93)  | 0.7           | 2.42 (0.37)***     | 0.28 (1.00)  | 4.2           |
| AGA                        | 1.93 (0.19)***     | -0.39 (1.10) | 12.5          | 2.70 (0.30)***     | -0.39 (1.13) | 12.2          |
| MEM                        | 2.14 (0.33)***     | -0.68 (0.68) | 8.3           | 2.58 (0.36)*       | -0.07 (1.06) | 7.2           |
| SOO                        | 1.95 (0.30)***     | -0.47 (1.05) | 12.7          | 2.76 (0.40)***     | -0.55 (1.13) | 15.5          |
| SAL                        | 2.40 (0.23)***     | -1.41 (0.01) | 36.1          | 3.49 (0.58)***     | -1.52 (0.02) | 43.5          |
| <b>FVC (L)</b>             |                    |              |               |                    |              |               |
| <i>Observed</i>            | <i>2.20 (0.51)</i> | -            | -             | <i>3.16 (0.70)</i> | -            | -             |
| CHH                        | 2.40 (0.26)***     | -0.65 (1.30) | 20.4          | 3.57 (0.48)***     | -0.87 (1.18) | 23.3          |
| DAS                        | 2.54 (0.29)***     | -0.74 (0.84) | 13.3          | 3.36 (0.43)***     | -0.40 (1.03) | 10.4          |
| DES                        | 2.27 (0.30)***     | -0.72 (4.15) | 38.5          | 3.37 (0.42)***     | -1.93 (4.88) | 51.5          |
| BIS                        | 1.87 (0.29)**      | 0.91 (1.11)  | 1.7           | 2.86 (0.38)***     | 0.67 (1.23)  | 3.4           |
| AGA                        | 2.35 (0.18)***     | -0.43 (1.19) | 14.5          | 3.33 (0.29)***     | -0.35 (1.16) | 12.8          |
| MEM                        | 2.40 (0.39)***     | -0.33 (0.64) | 2.7           | 3.50 (0.37)***     | -0.67 (1.06) | 17.3          |
| SOO                        | 2.21 (0.33)*       | -0.04 (1.07) | 6.8           | 3.24 (0.46)***     | -0.17 (1.14) | 9.2           |
| SAL                        | 2.70 (0.24)        | -1.12 (0.01) | 26.1          | 3.86 (0.71)***     | -1.05 (0.02) | 28.8          |
| <b>FEV<sub>1</sub>/FVC</b> |                    |              |               |                    |              |               |
| <i>Observed</i>            | <i>0.82 (0.06)</i> | -            | -             | <i>0.81 (0.06)</i> | -            | -             |
| CHH                        | 0.78 (0.06)***     | 0.96 (1.60)  | 3.7           | 0.77 (0.03)***     | 0.59 (1.17)  | 4.0           |
| DAS                        | 0.83 (0.03)**      | -0.04 (0.84) | 2.8           | 0.83 (0.02)**      | -0.30 (0.68) | 4.0           |
| DES                        | 1.15 (0.07)***     | -5.07 (1.44) | 99.7          | 0.81 (0.02)***     | -0.10 (1.33) | 11.0          |
| AGA                        | 0.82 (0.03)***     | 0.09 (1.10)  | 4.7           | 0.81 (0.03)***     | -0.13 (1.26) | 10.0          |
| SAL                        | 0.86 (0.01)***     | -1.25 (0.03) | 38.2          | 0.89 (0.01)***     | -2.85 (0.05) | 71.9          |

1. Paired sample t-test (observed-predicted) p-value: \*\*\*<0.0001; \*\*<0.001; \*<0.01

2. CHH= Chhabra, DAS= Dasgupta, DES= Desai, BIS= Biswas, AGA= Aggarwal, MEM= Memon, SOO= Sooriyanathan, SAL= Saleem

**Table S8.** Table of characteristics for participants in development dataset (n=5589) and internal validation dataset (n=1864).

|                        | <b>Female</b> |                     | <b>Male</b> |                     |
|------------------------|---------------|---------------------|-------------|---------------------|
|                        | Development   | Internal validation | Development | Internal validation |
| <b>No. of subjects</b> | 4121          | 1356                | 1468        | 508                 |
| <b>Age (yrs)</b>       | 44.5 (12.8)   | 44.5 (12.9)         | 45.3 (13.0) | 44.1 (13.6)         |
| <b>Age group (yrs)</b> | %             | %                   | %           | %                   |
| 18-30                  | 13.9          | 13.9                | 13.6        | 15.8                |
| 31-39                  | 25.7          | 24.9                | 21.0        | 26.8                |
| 41-49                  | 25.6          | 27.1                | 30.0        | 24.6                |
| 50-59                  | 20.3          | 19.0                | 20.7        | 18.3                |
| ≥60                    | 14.6          | 15.2                | 14.7        | 14.6                |
| <b>Height (cm)</b>     | 151.5 (5.9)   | 151.5 (6.1)         | 163.9 (7.0) | 163.8 (7.1)         |
| <b>Weight (kg)</b>     | 59.4 (12.9)   | 59.7 (13.4)         | 67.0 (14.2) | 66.6 (14.4)         |
| <b>Countries</b>       | %             | %                   | %           | %                   |
| Bangladesh             | 76.2          | 73.3                | 23.8        | 26.7                |
| North India            | 68.1          | 70.3                | 31.9        | 29.7                |
| South India            | 68.7          | 69.8                | 31.3        | 30.2                |
| Pakistan               | 75.6          | 70.4                | 24.4        | 29.6                |
| Sri Lanka              | 77.7          | 76.2                | 22.3        | 23.8                |

**Table S9.** Regression output for FEV<sub>1</sub>, FVC and FEV<sub>1</sub>/FVC stratified by sex (n=5589, female: n=4121; male: n=1468)

| FEMALE             |                          |                           |                          |                          |                           |                           |                            |                            |                            |
|--------------------|--------------------------|---------------------------|--------------------------|--------------------------|---------------------------|---------------------------|----------------------------|----------------------------|----------------------------|
| VARIABLES          | FEV <sub>1</sub> (L)     |                           |                          | FVC (L)                  |                           |                           | FEV <sub>1</sub> /FVC      |                            |                            |
|                    | M1                       | M2                        | M3                       | M1                       | M2                        | M3                        | M1                         | M2                         | M3                         |
| Age                | -0.0173***<br>(0.000399) | -0.0172***<br>(0.000399)  | -0.0167***<br>(0.000403) | -0.0200***<br>(0.000485) | -0.0199***<br>(0.000482)  | -0.0185***<br>(0.000486)  | -0.000209***<br>(7.36e-05) | -0.000229***<br>(7.25e-05) | -0.000605***<br>(7.27e-05) |
| Height             | 0.0238***<br>(0.000868)  | 0.0251***<br>(0.000964)   | 0.0242***<br>(0.000939)  | 0.0305***<br>(0.00105)   | 0.0343***<br>(0.00117)    | 0.0336***<br>(0.00113)    | -0.000628***<br>(0.000160) | -0.00149***<br>(0.000175)  | -0.00158***<br>(0.000169)  |
| Weight             |                          | -0.00139***<br>(0.000432) | 0.0005<br>(0.000442)     |                          | -0.00390***<br>(0.000523) | -0.00148***<br>(0.000533) |                            | 0.000877***<br>(7.86e-05)  | 0.000765***<br>(7.97e-05)  |
| Study Region       |                          |                           |                          |                          |                           |                           |                            |                            |                            |
| 2.North India      |                          |                           | -0.169***<br>(0.0127)    |                          |                           | -0.172***<br>(0.0153)     |                            |                            | -0.0123***<br>(0.00229)    |
| 3.South India      |                          |                           | -0.296***<br>(0.0212)    |                          |                           | -0.432***<br>(0.0256)     |                            |                            | 0.0473***<br>(0.00383)     |
| 4.Pakistan         |                          |                           | -0.204***<br>(0.0266)    |                          |                           | -0.199***<br>(0.0321)     |                            |                            | -0.0152***<br>(0.00480)    |
| 5.Sri Lanka        |                          |                           | -0.0679***<br>(0.0132)   |                          |                           | -0.139***<br>(0.0159)     |                            |                            | 0.0246***<br>(0.00238)     |
| Constant           | -1.027***<br>(0.136)     | -1.152***<br>(0.141)      | -1.060***<br>(0.138)     | -1.533***<br>(0.165)     | -1.883***<br>(0.170)      | -1.859***<br>(0.166)      | 0.929***<br>(0.0250)       | 1.008***<br>(0.0256)       | 1.039***<br>(0.0248)       |
| Observations       | 4,121                    | 4,121                     | 4,121                    | 4,121                    | 4,121                     | 4,121                     | 4,121                      | 4,121                      | 4,121                      |
| R-squared          | 0.429                    | 0.430                     | 0.471                    | 0.422                    | 0.430                     | 0.473                     | 0.005                      | 0.034                      | 0.118                      |
| N                  | 4121                     | 4121                      | 4121                     | 4121                     | 4121                      | 4121                      | 4121                       | 4121                       | 4121                       |
| RSD                | 0.323                    | 0.322                     | 0.311                    | 0.392                    | 0.390                     | 0.375                     | 0.0595                     | 0.0586                     | 0.0560                     |
| Adjusted R-squared | 0.428                    | 0.430                     | 0.470                    | 0.422                    | 0.430                     | 0.472                     | 0.00444                    | 0.0334                     | 0.117                      |
| MALE               |                          |                           |                          |                          |                           |                           |                            |                            |                            |
| VARIABLES          | FEV <sub>1</sub> (L)     |                           |                          | FVC (L)                  |                           |                           | FEV <sub>1</sub> /FVC      |                            |                            |
|                    | M1                       | M2                        | M3                       | M1                       | M2                        | M3                        | M1                         | M2                         | M3                         |
| Age                | -0.0215***<br>(0.000909) | -0.0215***<br>(0.000907)  | -0.0210***<br>(0.000912) | -0.0224***<br>(0.00107)  | -0.0224***<br>(0.00107)   | -0.0211***<br>(0.00107)   | -0.00122***<br>(0.000126)  | -0.00122***<br>(0.000125)  | -0.00145***<br>(0.000128)  |
| Height             | 0.0350***                | 0.0379***                 | 0.0365***                | 0.0458***                | 0.0516***                 | 0.0500***                 | -0.000703***               | -0.00132***                | -0.00134***                |

|                           |           |             |            |           |             |             |            |             |             |
|---------------------------|-----------|-------------|------------|-----------|-------------|-------------|------------|-------------|-------------|
|                           | (0.00169) | (0.00193)   | (0.00188)  | (0.00199) | (0.00227)   | (0.00220)   | (0.000234) | (0.000266)  | (0.000263)  |
| <b>Weight</b>             |           | -0.00295*** | -0.00109   |           | -0.00575*** | -0.00347*** |            | 0.000614*** | 0.000599*** |
| Study Region              |           | (0.000943)  | (0.000946) |           | (0.00111)   | (0.00111)   |            | (0.000130)  | (0.000133)  |
| <b>2.North India</b>      |           |             | -0.199***  |           |             | -0.212***   |            |             | -0.00988**  |
|                           |           |             | (0.0283)   |           |             | (0.0332)    |            |             | (0.00397)   |
| <b>3.South India</b>      |           |             | -0.404***  |           |             | -0.558***   |            |             | 0.0214***   |
|                           |           |             | (0.0450)   |           |             | (0.0527)    |            |             | (0.00631)   |
| <b>4.Pakistan</b>         |           |             | -0.162**   |           |             | -0.129*     |            |             | -0.0172*    |
|                           |           |             | (0.0644)   |           |             | (0.0753)    |            |             | (0.00902)   |
| <b>5.Sri Lanka</b>        |           |             | -0.0604*   |           |             | -0.144***   |            |             | 0.0198***   |
|                           |           |             | (0.0331)   |           |             | (0.0387)    |            |             | (0.00464)   |
| <b>Constant</b>           | -2.225*** | -2.507***   | -2.303***  | -3.349*** | -3.902***   | -3.704***   | 0.976***   | 1.035***    | 1.049***    |
|                           | (0.284)   | (0.297)     | (0.291)    | (0.336)   | (0.349)     | (0.340)     | (0.0394)   | (0.0410)    | (0.0407)    |
|                           |           |             |            |           |             |             |            |             |             |
| <b>Observations</b>       | 1,468     | 1,468       | 1,468      | 1,468     | 1,468       | 1,468       | 1,468      | 1,468       | 1,468       |
| <b>R-squared</b>          | 0.429     | 0.432       | 0.471      | 0.422     | 0.433       | 0.476       | 0.063      | 0.077       | 0.114       |
| <b>N</b>                  | 1468      | 1468        | 1468       | 1468      | 1468        | 1468        | 1468       | 1468        | 1468        |
| <b>RSD</b>                | 0.449     | 0.448       | 0.432      | 0.531     | 0.526       | 0.506       | 0.0622     | 0.0618      | 0.0606      |
| <b>Adjusted R-squared</b> | 0.428     | 0.431       | 0.469      | 0.421     | 0.431       | 0.474       | 0.0616     | 0.0751      | 0.110       |

M1: adjusted for age, height

M2: adjusted for age, height, weight

M3: adjusted for age, height, weight and study region (factorial variable)

\*\*\* $p < 0.001$ , \*\* $p < 0.01$ , \* $p < 0.05$

**Table S10.** Internal validation: mean z-score and % predicted for M1, M2 and M3, stratified by study regions and sex (n=1864).

|                    | FEMALE           |             |              |             |                       |             |
|--------------------|------------------|-------------|--------------|-------------|-----------------------|-------------|
|                    | FEV <sub>1</sub> |             | FVC          |             | FEV <sub>1</sub> /FVC |             |
|                    | Mean z-score     | % predicted | Mean z-score | % predicted | Mean z-score          | % predicted |
| <b>Bangladesh</b>  |                  |             |              |             |                       |             |
| M1                 | 0.25             | 104.7       | 0.27         | 105.2       | -0.10                 | 99.3        |
| M2                 | 0.23             | 104.3       | 0.23         | 104.4       | -0.04                 | 99.7        |
| M3                 | -0.02            | 99.8        | -0.04        | 99.5        | 0.04                  | 100.2       |
| <b>North India</b> |                  |             |              |             |                       |             |
| M1                 | -0.14            | 97.6        | -0.04        | 99.3        | -0.29                 | 97.9        |
| M2                 | -0.14            | 97.7        | -0.03        | 99.7        | -0.32                 | 97.7        |
| M3                 | 0.11             | 102.0       | 0.12         | 102.0       | -0.03                 | 99.8        |
| <b>South India</b> |                  |             |              |             |                       |             |
| M1                 | -0.62            | 88.3        | -0.85        | 83.6        | 0.88                  | 106.4       |
| M2                 | -0.59            | 88.9        | -0.79        | 84.9        | 0.80                  | 105.7       |
| M3                 | 0.01             | 100.7       | -0.04        | 99.5        | 0.14                  | 100.9       |
| <b>Pakistan</b>    |                  |             |              |             |                       |             |
| M1                 | -0.25            | 95.5        | -0.10        | 97.9        | -0.42                 | 96.9        |
| M2                 | -0.21            | 96.2        | 0.00         | 99.4        | -0.57                 | 96.0        |
| M3                 | 0.09             | 101.3       | 0.14         | 101.8       | -0.19                 | 98.7        |
| <b>Sri Lanka</b>   |                  |             |              |             |                       |             |
| M1                 | 0.14             | 102.6       | 0.06         | 101.3       | 0.15                  | 101.1       |
| M2                 | 0.14             | 102.7       | 0.07         | 101.7       | 0.13                  | 100.9       |
| M3                 | 0.05             | 100.9       | 0.10         | 101.9       | -0.16                 | 98.9        |
|                    | MALE             |             |              |             |                       |             |
|                    | FEV <sub>1</sub> |             | FVC          |             | FEV <sub>1</sub> /FVC |             |
|                    | Mean z-score     | % pred      | Mean z-score | % pred      | Mean z-score          | % pred      |
| <b>Bangladesh</b>  |                  |             |              |             |                       |             |
| M1                 | 0.32             | 106.1       | 0.38         | 107.0       | -0.12                 | 99.1        |
| M2                 | 0.29             | 105.6       | 0.33         | 106.2       | -0.08                 | 99.4        |
| M3                 | 0.04             | 100.9       | 0.06         | 101.4       | -0.06                 | 99.6        |
| <b>North India</b> |                  |             |              |             |                       |             |
| M1                 | -0.21            | 97.9        | -0.15        | 97.4        | -0.19                 | 98.5        |
| M2                 | -0.20            | 97.7        | -0.13        | 97.7        | -0.21                 | 98.4        |
| M3                 | -0.03            | 99.8        | -0.02        | 99.5        | -0.03                 | 99.7        |
| <b>South India</b> |                  |             |              |             |                       |             |
| M1                 | -0.43            | 106.4       | -0.57        | 92.6        | 0.31                  | 90.8        |
| M2                 | -0.42            | 105.7       | -0.56        | 92.9        | 0.30                  | 91.3        |
| M3                 | 0.20             | 100.9       | 0.19         | 105.7       | 0.02                  | 105.5       |
| <b>Pakistan</b>    |                  |             |              |             |                       |             |
| M1                 | -0.32            | 94.5        | -0.15        | 97.5        | -0.24                 | 98.2        |
| M2                 | -0.29            | 95.3        | -0.09        | 98.8        | -0.31                 | 97.7        |
| M3                 | -0.23            | 96.3        | -0.17        | 97.5        | 0.00                  | 100.0       |
| <b>Sri Lanka</b>   |                  |             |              |             |                       |             |
| M1                 | 0.22             | 104.6       | 0.07         | 101.9       | 0.37                  | 102.9       |
| M2                 | 0.23             | 105.0       | 0.10         | 102.5       | 0.35                  | 102.7       |
| M3                 | 0.09             | 102.1       | 0.06         | 101.6       | 0.08                  | 100.6       |

1. One sided t-test of mean z-score=0; \*\*\*p<0.0001, \*\*p<0.001, \*P<0.01

2. M1: adjusted for age, height; M2: adjusted for age, height, weight; M3: adjusted for age, height, weight, study region

**Table S11.** Internal validation: percentage of healthy subjects categorised below lower limit of normal (LLN) for FEV<sub>1</sub>, FVC, FEV<sub>1</sub>/FVC, stratified by reference equations and sex (n=1864).

| % < LLN        | Female               |         |                       | Male                 |         |                       |
|----------------|----------------------|---------|-----------------------|----------------------|---------|-----------------------|
|                | FEV <sub>1</sub> (L) | FVC (L) | FEV <sub>1</sub> /FVC | FEV <sub>1</sub> (L) | FVC (L) | FEV <sub>1</sub> /FVC |
| <b>M1</b>      | 5.4                  | 4.2     | 5.2                   | 5.5                  | 4.9     | 5.3                   |
| <b>M2</b>      | 5.2                  | 4.3     | 5.4                   | 5.7                  | 5.3     | 5.3                   |
| <b>M3</b>      | 4.1                  | 3.2     | 5.4                   | 5.5                  | 5.1     | 5.1                   |
| <b>CHH</b>     | 11.5                 | 18.7    | 3.6                   | 15.4                 | 21.7    | 4.1                   |
| <b>DAS</b>     | 17.7                 | 12.3    | 2.8                   | 12.4                 | 10.6    | 4.1                   |
| <b>DES</b>     | 30.3                 | 37.1    | 99.8                  | 25.2                 | 50.6    | 11.0                  |
| <b>BIS</b>     | 0.4                  | 1.0     | -^                    | 4.5                  | 3.9     | -^                    |
| <b>AGA</b>     | 11.6                 | 13.0    | 4.9                   | 11.2                 | 12.0    | 10.4                  |
| <b>MEM</b>     | 8.3                  | 2.0     | -^                    | 6.9                  | 15.4    | -^                    |
| <b>SOO</b>     | 12.5                 | 5.5     | -^                    | 14.2                 | 9.4     | -^                    |
| <b>SAL1</b>    | 36.7                 | 26.2    | 37.8                  | 44.9                 | 28.3    | 28.2                  |
| <b>NHA(AA)</b> | 18.9                 | 18.2    | 4.2                   | 15.9                 | 16.7    | 6.9                   |
| <b>GLI(AA)</b> | 27.9                 | 25.9    | 4.1                   | 17.3                 | 18.5    | 6.9                   |

M1, M2, M3 are predictive equations from current study; CHH= Chhabra; DAS= Dasgupta; DES= Desai; BIS= Biswas; AGA= Aggarwal; MEM= Memon; SOO= Sooriyakanthan; SAL= Saleem; NHA(AA)= NHANES (African-American); GLI(AA)= GLI2012 (African-American)

Note:

-^spirometry reference equations are not available for measuring FEV<sub>1</sub>/FVC

**Table S12.** Internal validation: Disease classification in healthy subjects, stratified by reference equations and sex (n=1864).

|                | Female |             |             |       | Male           |             |             |       |       |
|----------------|--------|-------------|-------------|-------|----------------|-------------|-------------|-------|-------|
|                | Normal | Obstructive | Restrictive | Mixed | Normal         | Obstructive | Restrictive | Mixed |       |
| <b>M1</b>      | 91.2%  | 4.6%        | 3.5%        | 0.6%  | <b>M1</b>      | 90.4%       | 4.7%        | 4.3   | 0.6   |
| <b>M2</b>      | 91.0%  | 4.7%        | 3.6%        | 0.7%  | <b>M2</b>      | 90.6%       | 4.1%        | 4.1%  | 1.2%  |
| <b>M3</b>      | 91.9%  | 4.9%        | 2.7%        | 0.4%  | <b>M3</b>      | 90.8%       | 4.1%        | 4.1%  | 1.0%  |
| <b>CHH</b>     | 76.5%  | 2.5%        | 19.8%       | 1.1%  | <b>CHH</b>     | 75.6%       | 2.8%        | 20.3% | 1.4%  |
| <b>DAS</b>     | 85.9%  | 1.8%        | 11.3%       | 1.0%  | <b>DAS</b>     | 86.6%       | 2.8%        | 9.3%  | 1.4%  |
| <b>DES</b>     | 0.0%   | 62.9%       | 0.2%        | 36.9% | <b>DES</b>     | 44.5%       | 4.9%        | 44.5% | 6.1%  |
| <b>SAL</b>     | 47.0%  | 26.8%       | 15.3%       | 10.9% | <b>SAL</b>     | 19.9%       | 51.8%       | 8.7%  | 19.7% |
| <b>SAL1</b>    | 50.5%  | 28.7%       | 11.7%       | 9.0%  | <b>SAL1</b>    | 0%          | 80.0%       | 0.0%  | 20.0% |
| <b>AGA</b>     | 83.5%  | 3.5%        | 11.6%       | 1.4%  | <b>AGA</b>     | 79.9%       | 8.1%        | 9.6%  | 2.4%  |
| <b>NHA(AA)</b> | 79.4%  | 2.4%        | 16.4%       | 1.8%  | <b>NHA(AA)</b> | 78.2%       | 5.1%        | 15.0% | 1.8%  |
| <b>GLI(AA)</b> | 71.8%  | 2.3%        | 24.0%       | 1.8%  | <b>GLI(AA)</b> | 76.8%       | 4.7%        | 16.3% | 2.2%  |

M1, M2, M3 are predictive equations from current study; CHH= Chhabra; DAS= Dasgupta; DES= Desai; BIS= Biswas; AGA= Aggarwal; MEM= Memon; SOO= Sooriyakanthan; SAL= Saleem; NHA(AA)= NHANES (African-American); GLI(AA)= GLI2012 (African-American)

**Table S13.** External validation (HELIOS): Percentage of healthy subjects categorised as below LLN (n=339, female: n=214; male: n=125).

|                  | % of subjects below Lower Limit of Normal (LLN) |      |         |      |                       |      |
|------------------|-------------------------------------------------|------|---------|------|-----------------------|------|
|                  | FEV <sub>1</sub> (L)                            |      | FVC (L) |      | FEV <sub>1</sub> /FVC |      |
|                  | Female                                          | Male | Female  | Male | Female                | Male |
| <b>M1</b>        | 1.9                                             | 4.8  | 1.9     | 4.8  | 1.9                   | 2.4  |
| <b>M2</b>        | 1.9                                             | 4.8  | 0.9     | 4.8  | 2.3                   | 2.4  |
| <b>M3 (BGD)</b>  | 4.7                                             | 6.4  | 5.1     | 10.4 | 2.3                   | 2.4  |
| <b>M3 (NI)</b>   | 0.9                                             | 4.0  | 1.9     | 4.0  | 1.9                   | 2.4  |
| <b>M3 (SI)</b>   | 0.5                                             | 3.2  | 0.5     | 1.6  | 13.1                  | 4.0  |
| <b>M3 (P)</b>    | 0.5                                             | 4.8  | 1.4     | 6.4  | 1.9                   | 2.4  |
| <b>M3 (SL)</b>   | 3.3                                             | 6.4  | 1.9     | 6.4  | 4.7                   | 4.0  |
| <b>NHA (C)</b>   | 60.7                                            | 50.4 | 80.8    | 76.0 | 1.4                   | 2.4  |
| <b>NHA (AA)</b>  | 9.8                                             | 12.8 | 14.0    | 14.4 | 1.9                   | 2.4  |
| <b>GLI (C)</b>   | 57.0                                            | 47.2 | 61.2    | 56.8 | 1.4                   | 2.4  |
| <b>GLI (AA)</b>  | 14.9                                            | 13.6 | 20.6    | 12.8 | 1.9                   | 2.4  |
| <b>GLI (SEA)</b> | 20.1                                            | 18.4 | 22.9    | 22.4 | 2.3                   | 4.8  |
| <b>GLI (OTH)</b> | 36.4                                            | 21.6 | 39.7    | 36.0 | 1.9                   | 2.4  |

*M3(BGD) = Bangladesh, M3(NI)= North India, M3(SI) = South India, M3(P)= Pakistan, M3(SL)=Sri Lanka; NHA(C)= NHANES (Caucasian); NHA(AA)= NHANES (African-American); GLI(C)= GLI2012 (Caucasian); GLI(AA)= GLI2012 (African-American); GLI(SEA)= GLI2012 (South East Asian); GLI(OTH)= GLI (Others)*

**Supplementary figure**

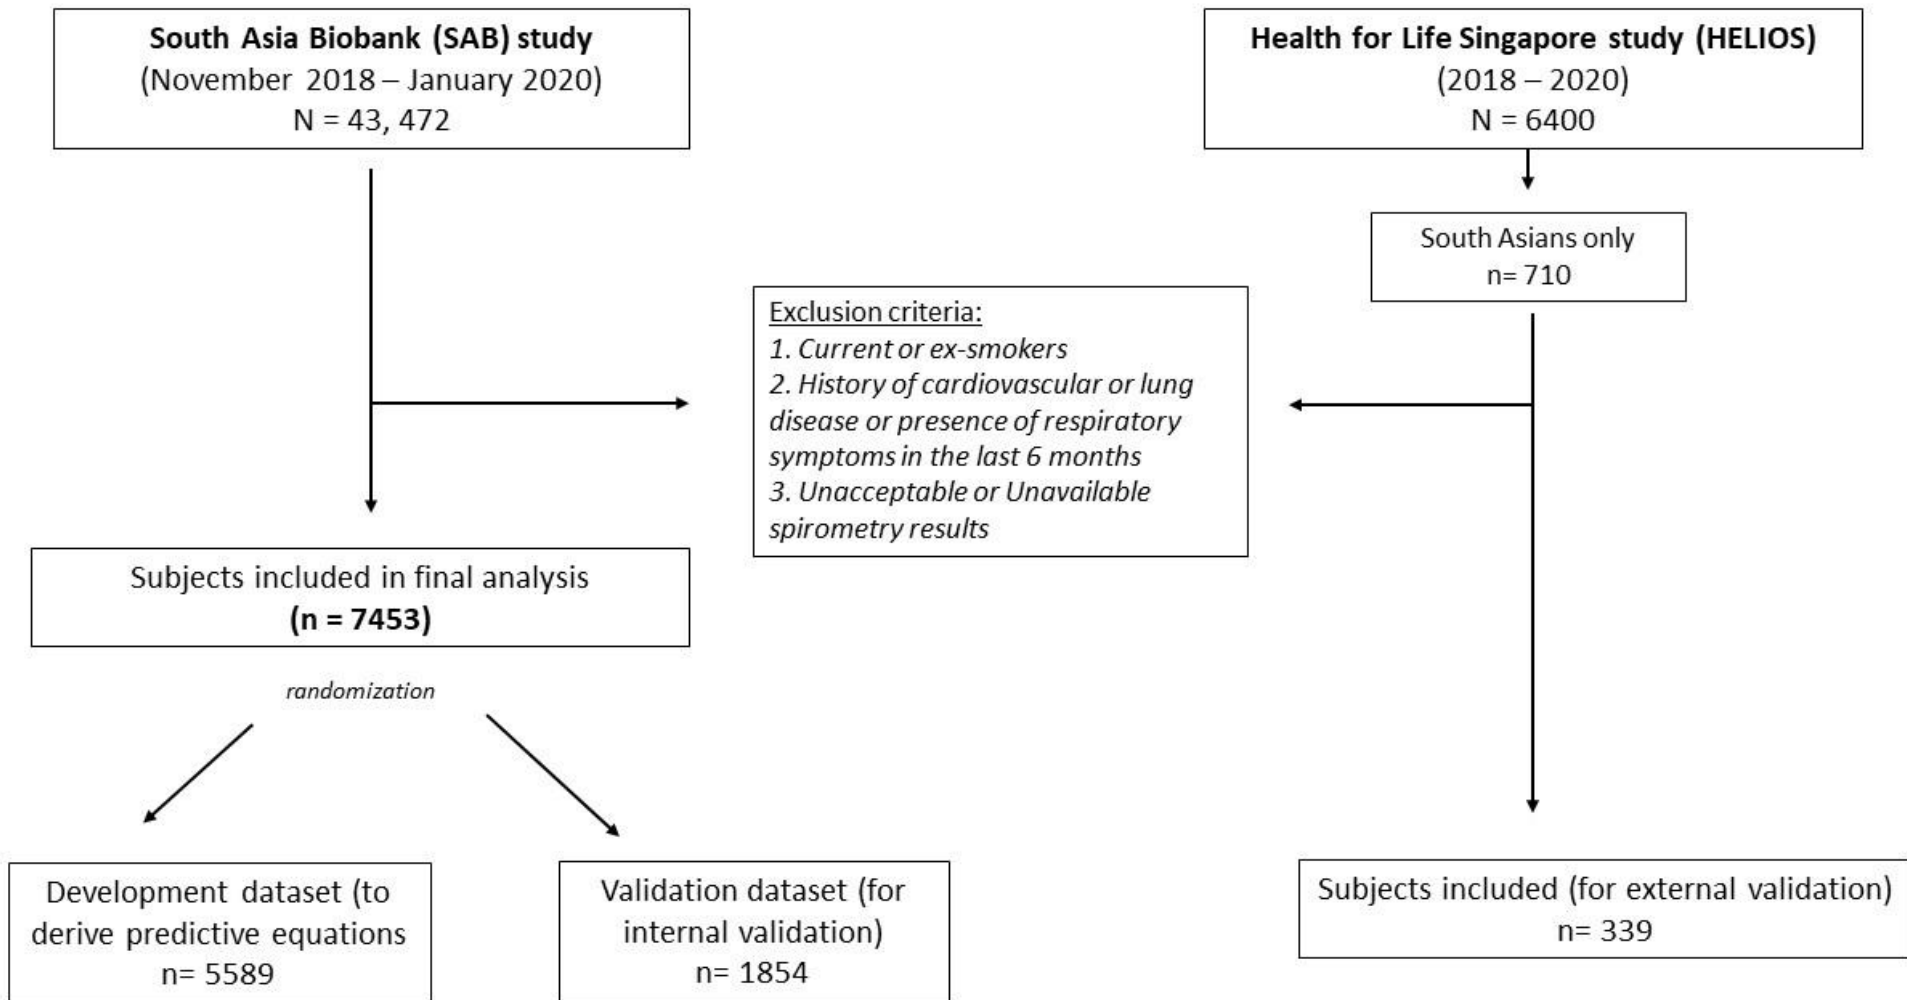

Figure S1. Flowchart of study design



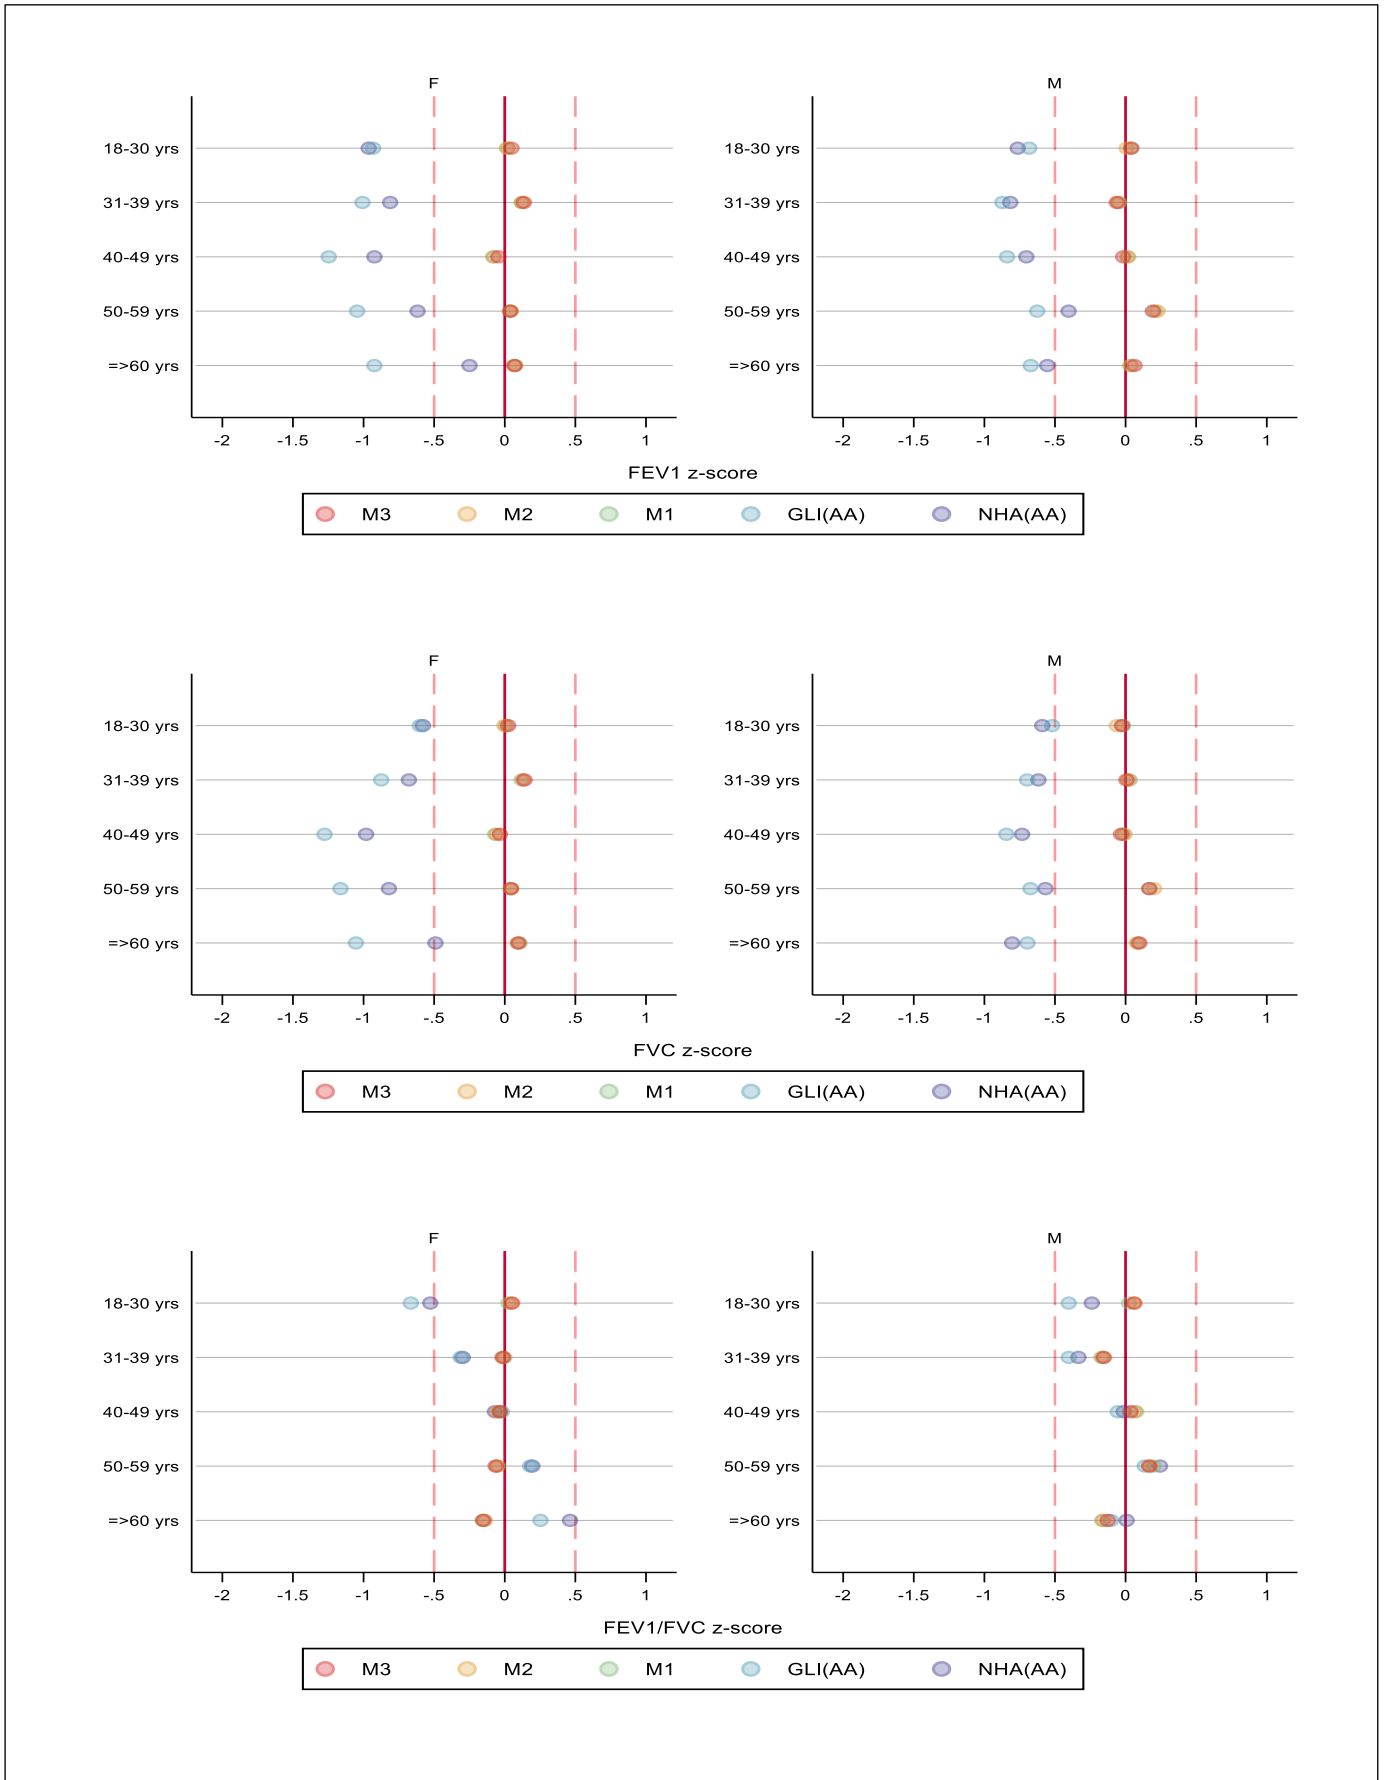

Figure S2. Mean z-score of FEV<sub>1</sub>, FVC and FEV<sub>1</sub>/FVC using GLI2012, NHANES and current predictive equations (M1, M2 and M3), stratified by age group and sex in internal validation (n=1864). NHA(AA)= NHANES (African-American); GLI(AA)= GLI2012 (African-American).

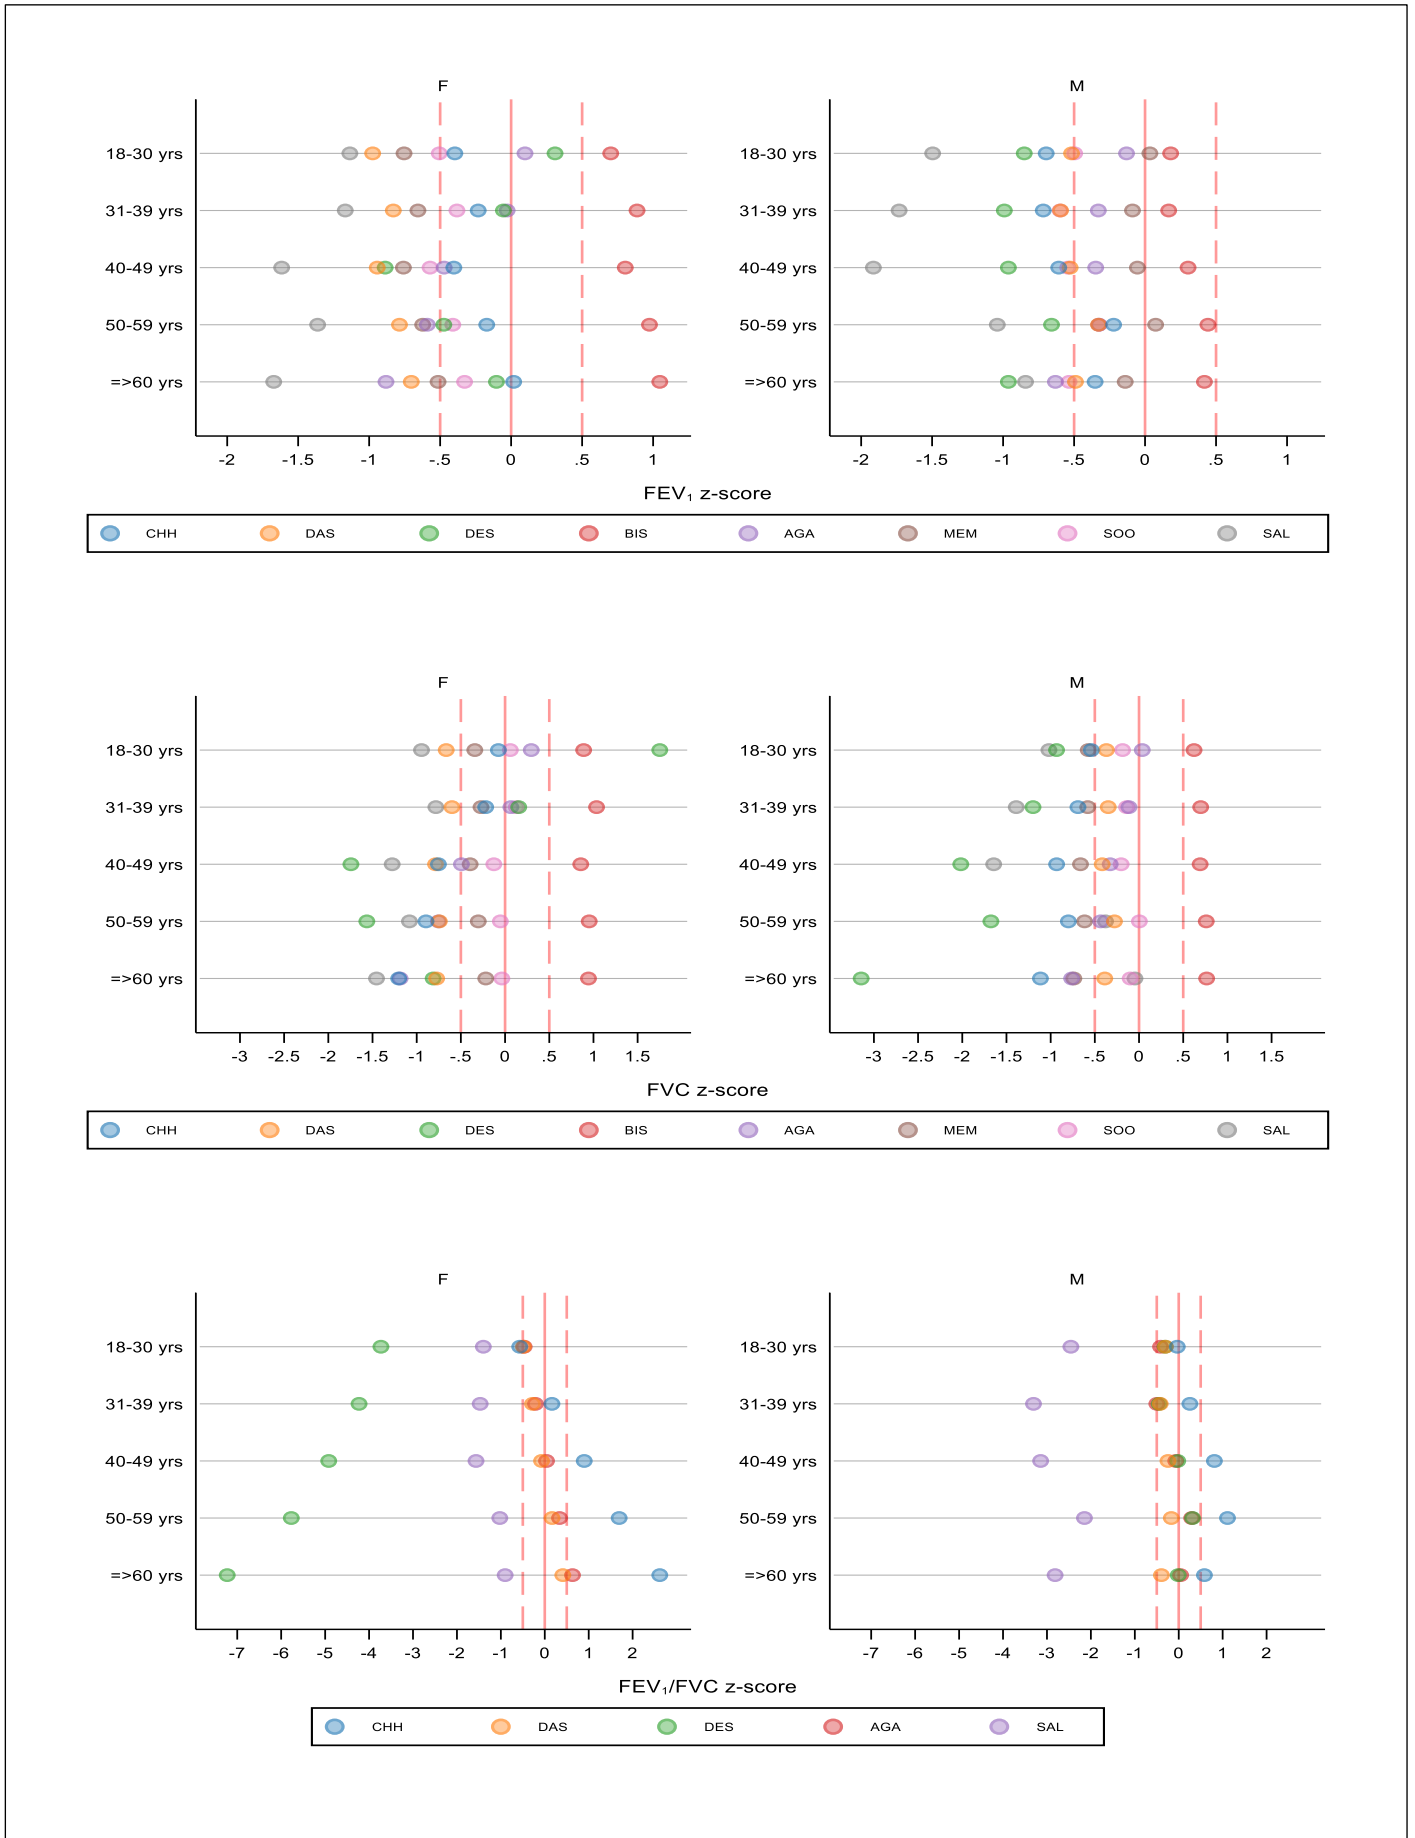

Figure S3. Mean z-score of FEV<sub>1</sub>, FVC and FEV<sub>1</sub>/FVC using South Asian published equations, stratified by age group and sex in internal validation (N=1864). (CHH= Chhabra; DAS= Dasgupta; DES= Desai; BIS= Biswas; AGA= Aggarwal; MEM= Memon; SOO= Sooriyakanthan; SAL= Saleem)
